# Supplementary material for: Spin unlocking oxygen evolution reaction on antiperovskite nitrides
Source: Royal Society of Chemistry journal article supplement (doi:10.1039/d1ta07561f), 2021-01-01
Supplement: d1ta07561f1.pdf [file d1ta07561f1.pdf]

## Electronic supplementary information

# Spin unlocking oxygen evolution reaction on antiperovskite nitrides

Huang Tang<sup>a, ‡</sup>, Deshuai Yang<sup>b, ‡</sup>, Mengfei Lu<sup>a,c, ‡</sup>, Shaoxi Kong<sup>a</sup>, Yanghui Hou<sup>a</sup>, Duanduan Liu<sup>a,c</sup>, Depei Liu<sup>a,c</sup>, Shicheng Yan<sup>a,\*</sup>, Zhaoxu Chen<sup>b,\*</sup>, Tao Yu<sup>c</sup> and Zhigang Zou<sup>a,c</sup>

<sup>a</sup> Jiangsu Key Laboratory of Artificial Functional Materials, Eco-materials and Renewable Energy Research Center (ERERC), Collaborative Innovation Center of Advanced Microstructures, College of Engineering and Applied Sciences, Nanjing University, Nanjing, Jiangsu 210093, P. R. China, E-mail: yscfei@nju.edu.cn

<sup>b</sup> School of Chemistry and Chemical Engineering, Nanjing University, Nanjing, Jiangsu 210093, P. R. China, E-mail: zxchen@nju.edu.cn

<sup>c</sup> Jiangsu Key Laboratory for Nano Technology, National Laboratory of Solid State Microstructures, School of Physics, Nanjing University, Nanjing, Jiangsu 210093, P. R. China

## Supplementary Text

**Calculations of  $e_g$  filling.** The temperature-dependent magnetizations (M) for the  $\text{Cu}_{0.5}\text{NFe}_{3.5}$  and  $\text{Cu}_{0.5}\text{NFe}_3\text{Ni}_{0.5}$  under  $H = 1$  kOe were shown in Fig. 2a. Above 700 K, the magnetic susceptibility ( $\chi = M/H$ ) calculated from the magnetization intensity obeyed to the paramagnetic Curie-Weiss law:  $\chi = C/(T-\theta)$ , where C is the Curie constant and  $\theta$  is the Curie-Weiss temperature (Fig. 2b). The Curie constant C could be calculated and the effective magnetic moment  $\mu_{\text{eff}} = \sqrt{8C} \mu_B$  of all samples could be obtained. The final calculated values were plotted in Fig. 2c. The effective magnetic moment was calculated without considering the contribution of  $\text{Cu}^{2+}$ , by using the formula of  $\mu_{\text{eff}}^2 = \mu_{\text{Fe}}^2 + \mu_{\text{Ni}}^2$ . Since  $\text{Ni}^{2+}$  has only a unique spin state ( $3d^8 e_g^2 t_{2g}^6$ ), the effective magnetic moment of  $\text{Ni}^{2+}$  was:  $\mu_{\text{Ni}} = g\mu_B \sqrt{S(S+1)}$ , where  $G = 2$ , G is the Lande factor, and  $S (= 1)$  is the spin quantum number of  $\text{Ni}^{2+}$ . Thus, the effective magnetic moment  $\mu_{\text{Fe}}$  of  $\text{Fe}^{3+}$  could be obtained. Then, according to the relation:  $\mu_{\text{Fe}} = g\mu_B \sqrt{S_{\text{HS}}(S_{\text{HS}} + 1)V_{\text{HS}} + S_{\text{LS}}(S_{\text{LS}} + 1)V_{\text{LS}}}$ , the volume fraction of  $\text{Fe}^{3+}$  in high spin (HS) and low spin (LS) states could be calculated, where  $S_{\text{HS}} (= 5/2)$  and  $S_{\text{LS}} (= 1/2)$  were the spin quantum number of the high spin state and the low spin state, respectively, and the spin quantum number is half of the number of all unpaired electrons in the spin state, and  $V_{\text{HS}}$  and  $V_{\text{LS}} (= 1-V_{\text{HS}})$  were the volume fraction of  $\text{Fe}^{3+}$  under HS and LS, respectively. Consequently, the  $e_g$  electron ( $x$ ) could be further calculated by  $x = S'_{\text{HS}} \times V_{\text{HS}} + S'_{\text{LS}} \times V_{\text{LS}} = 2 V_{\text{HS}}$ . Here  $S'_{\text{HS}}$  and  $S'_{\text{LS}}$  were the number of  $\text{Fe}^{3+}$   $e_g$  electrons under HS and LS, respectively. The calculated results of the  $e_g$  electron ( $x$ ) of  $\text{Fe}^{3+}$  of  $\text{Cu}_{0.5}\text{NFe}_{3.5}$  and  $\text{Cu}_{0.5}\text{NFe}_3\text{Ni}_{0.5}$  were 0.74 and 1.19, respectively.

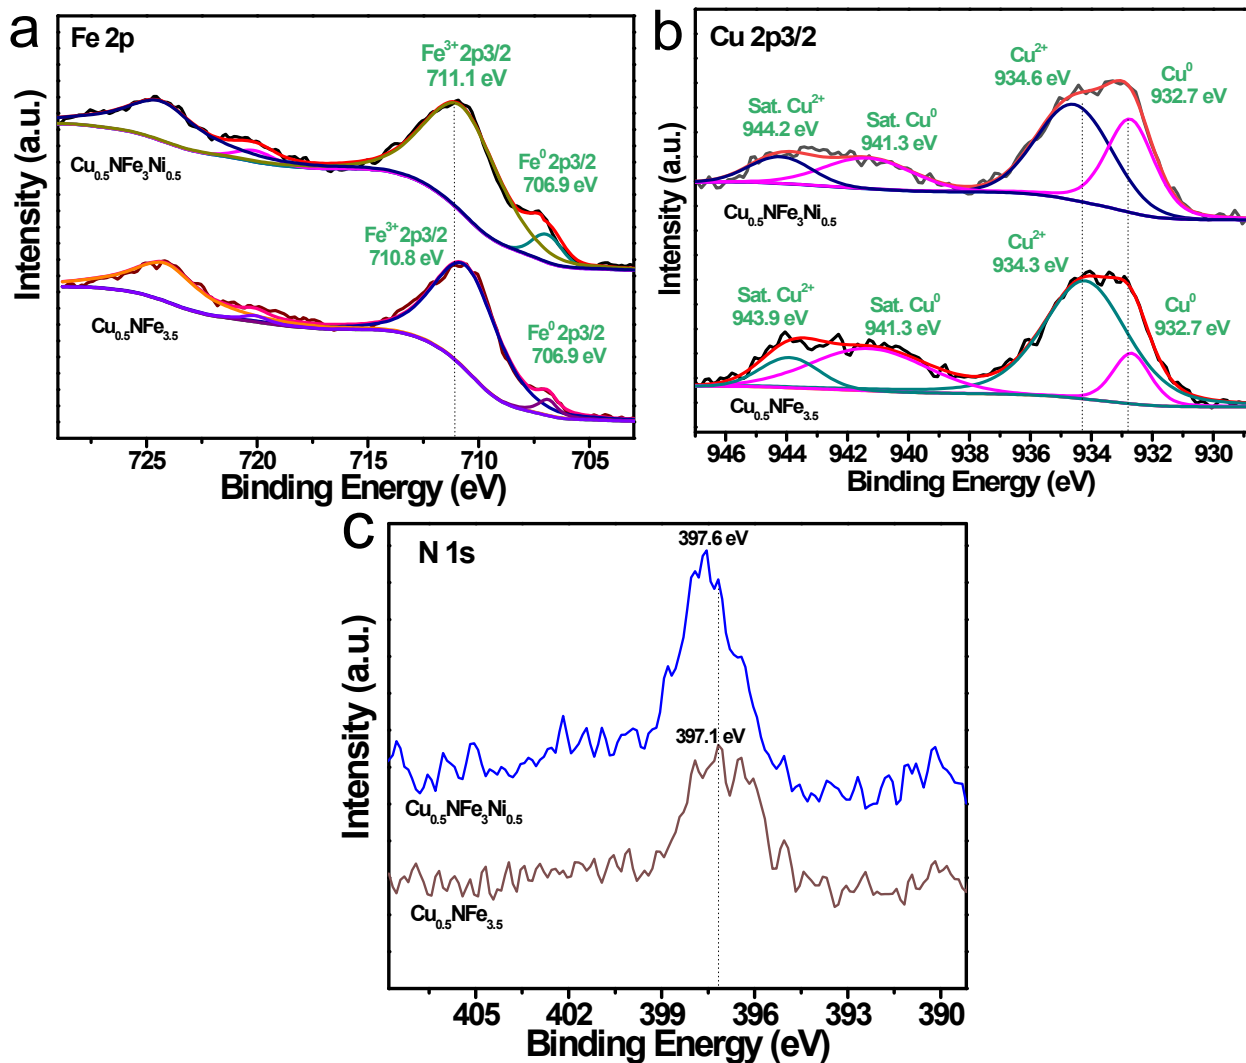

Fig. S1 Effects of Ni doping on XPS spectra of  $\text{Cu}_{0.5}\text{NFe}_{3.5}$ . (a) Fe 2p. (b) Cu 2p<sub>3/2</sub>. (c) N 1s.

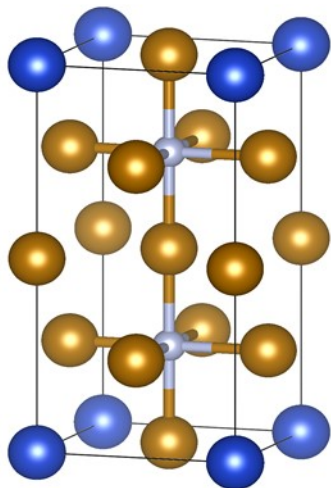

**Cu at vertex**  
**E= -80.08 eV**

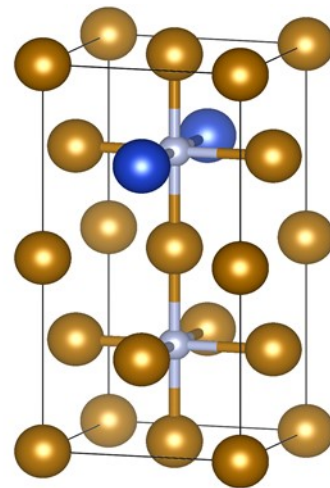

**Cu at face center 1**  
**E= -78.04 eV**

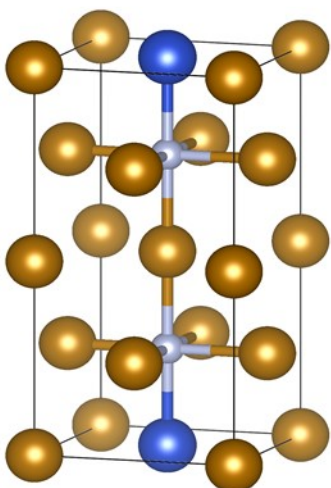

**Cu at face center 2**  
**E= -78.01 eV**

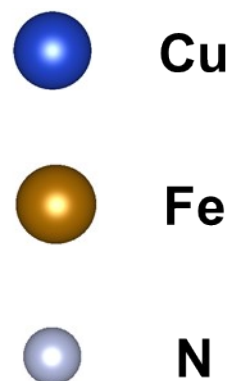

**Fig. S2** Optimized structure of  $\text{Cu}_{0.5}\text{NFe}_{3.5}$ . Cu at the vertex or at face center. The theoretical calculations indicated that the Cu atoms tend to occupy the vertex of cube.

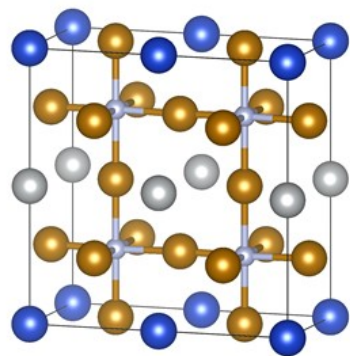

**Ni at vertex**  
**E= -155.45 eV**

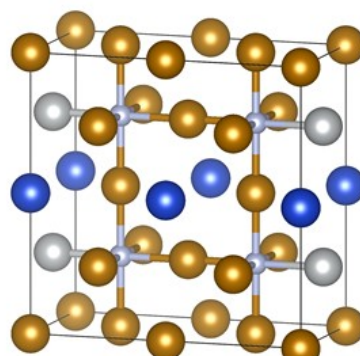

**Ni at face center 1**  
**E= -154.29 eV**

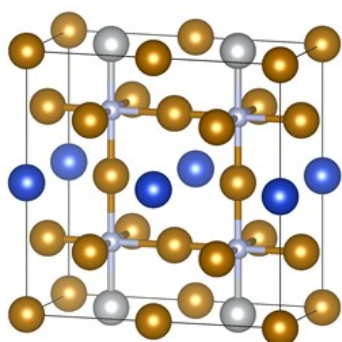

**Ni at face center 2**  
**E= -154.06 eV**

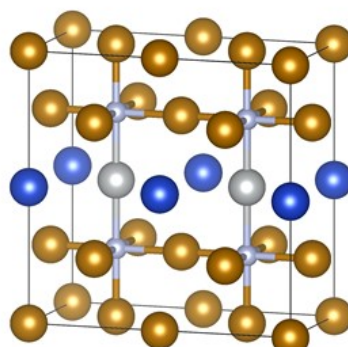

**Ni at face center 3**  
**E= -154.72 eV**

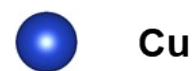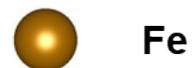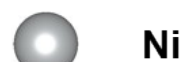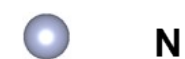

**Fig. S3** Optimized structure of  $\text{Cu}_{0.5}\text{NFe}_3\text{Ni}_{0.5}$ . Ni at the vertex or at face center. The theoretical calculations indicated that the Ni atoms tend to occupy the vertex of cube.

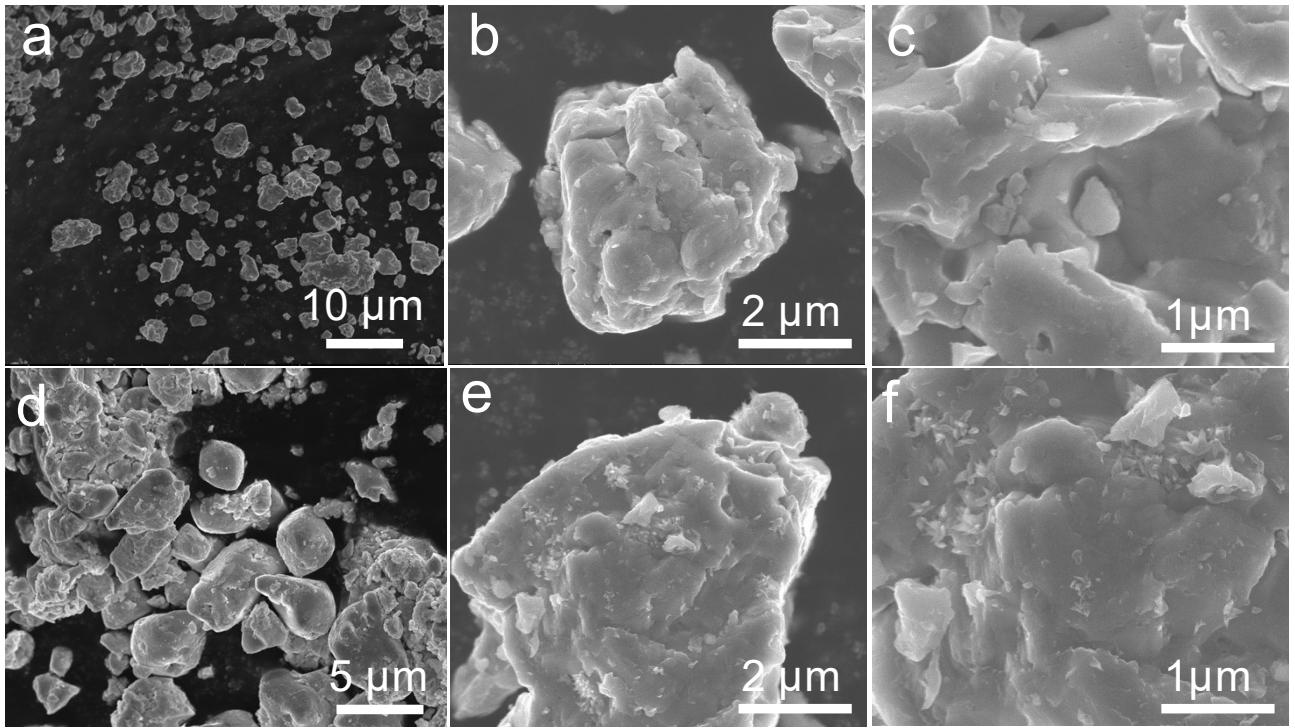

**Fig. S4** SEM images. (a-c)  $\text{Cu}_{0.5}\text{NFe}_{3.5}$ . (d-f)  $\text{Cu}_{0.5}\text{NFe}_3\text{Ni}_{0.5}$ .

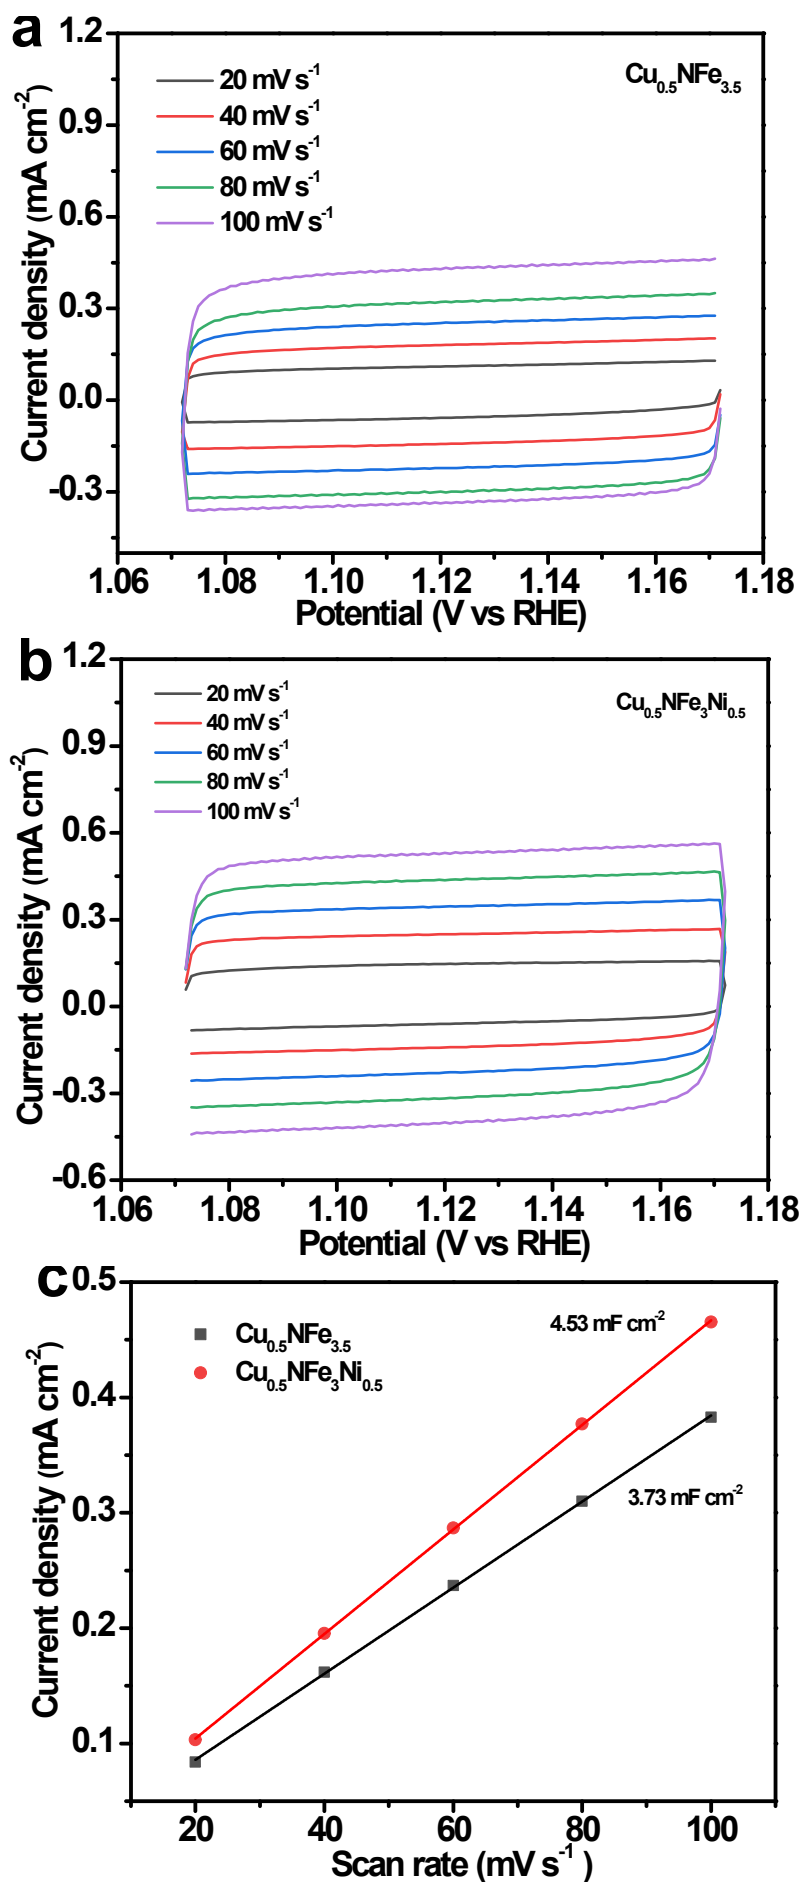

**Fig. S5** ECSA measurement. (a)  $\text{Cu}_{0.5}\text{NFe}_{3.5}$ . (b)  $\text{Cu}_{0.5}\text{NFe}_3\text{Ni}_{0.5}$ . (c) The corresponding linear fitting of the capacitive currents versus CV scans.

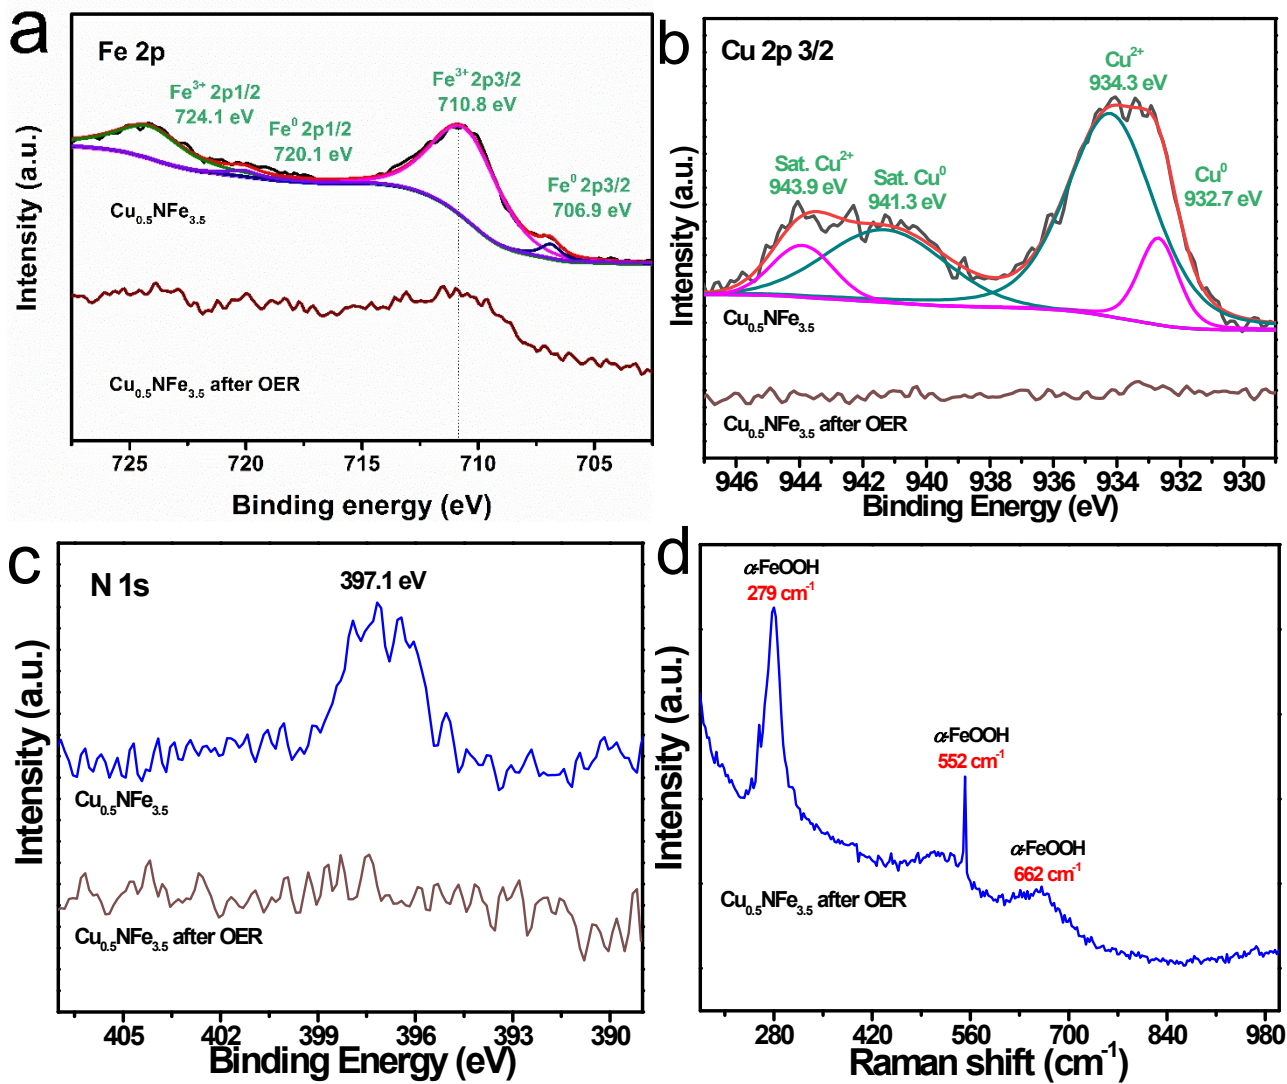

**Fig. S6** Changes of surface properties for  $\text{Cu}_{0.5}\text{NFe}_{3.5}$  during OER. (a-c) XPS spectra for Fe 2p, Cu 2p 3/2, and Ni 1s. (d) Raman spectrum.



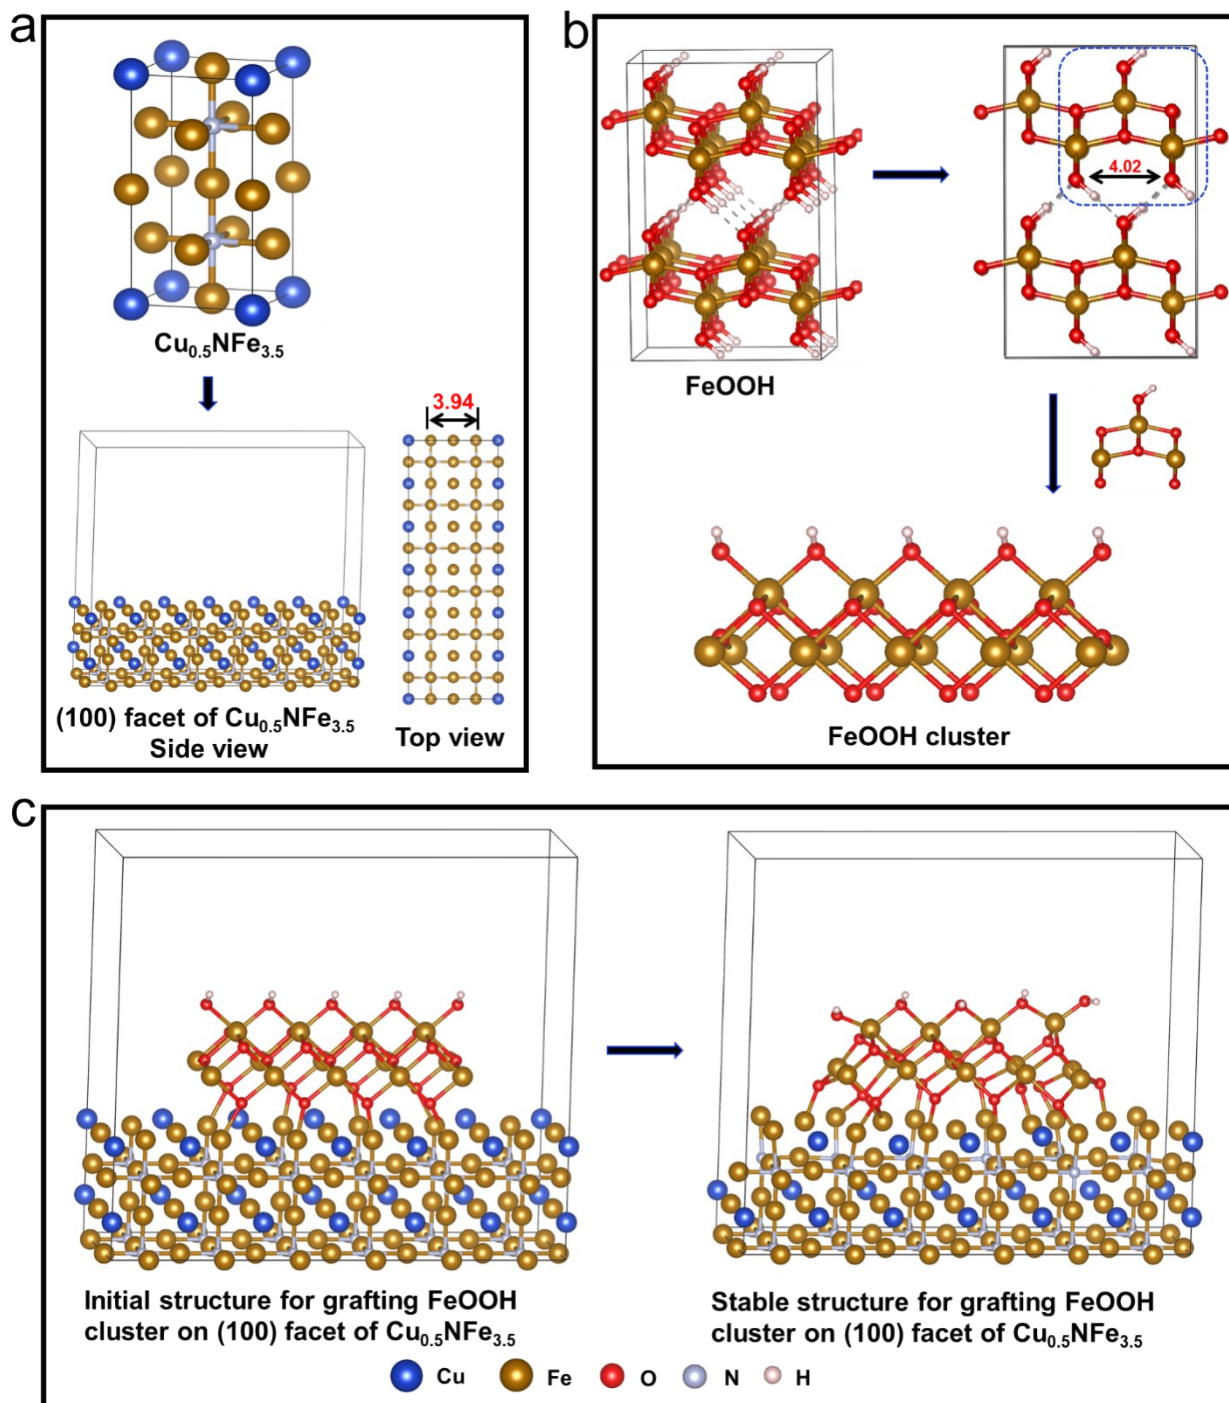

**Fig. S7** The structure of grafting FeOOH cluster on (100) facet of  $\text{Cu}_{0.5}\text{NFe}_{3.5}$ . (a) The structure of  $\text{Cu}_{0.5}\text{NFe}_{3.5}$  and (100) facet of  $\text{Cu}_{0.5}\text{NFe}_{3.5}$ . (b) The structures of FeOOH and its cluster. The FeOOH cluster is constructed by matching the distance between adjacent O atoms of FeOOH and the distance of two Fe atoms on (100) facet of  $\text{Cu}_{0.5}\text{NFe}_{3.5}$ . (c) Grafting the FeOOH cluster onto (100) facet of  $\text{Cu}_{0.5}\text{NFe}_{3.5}$ .

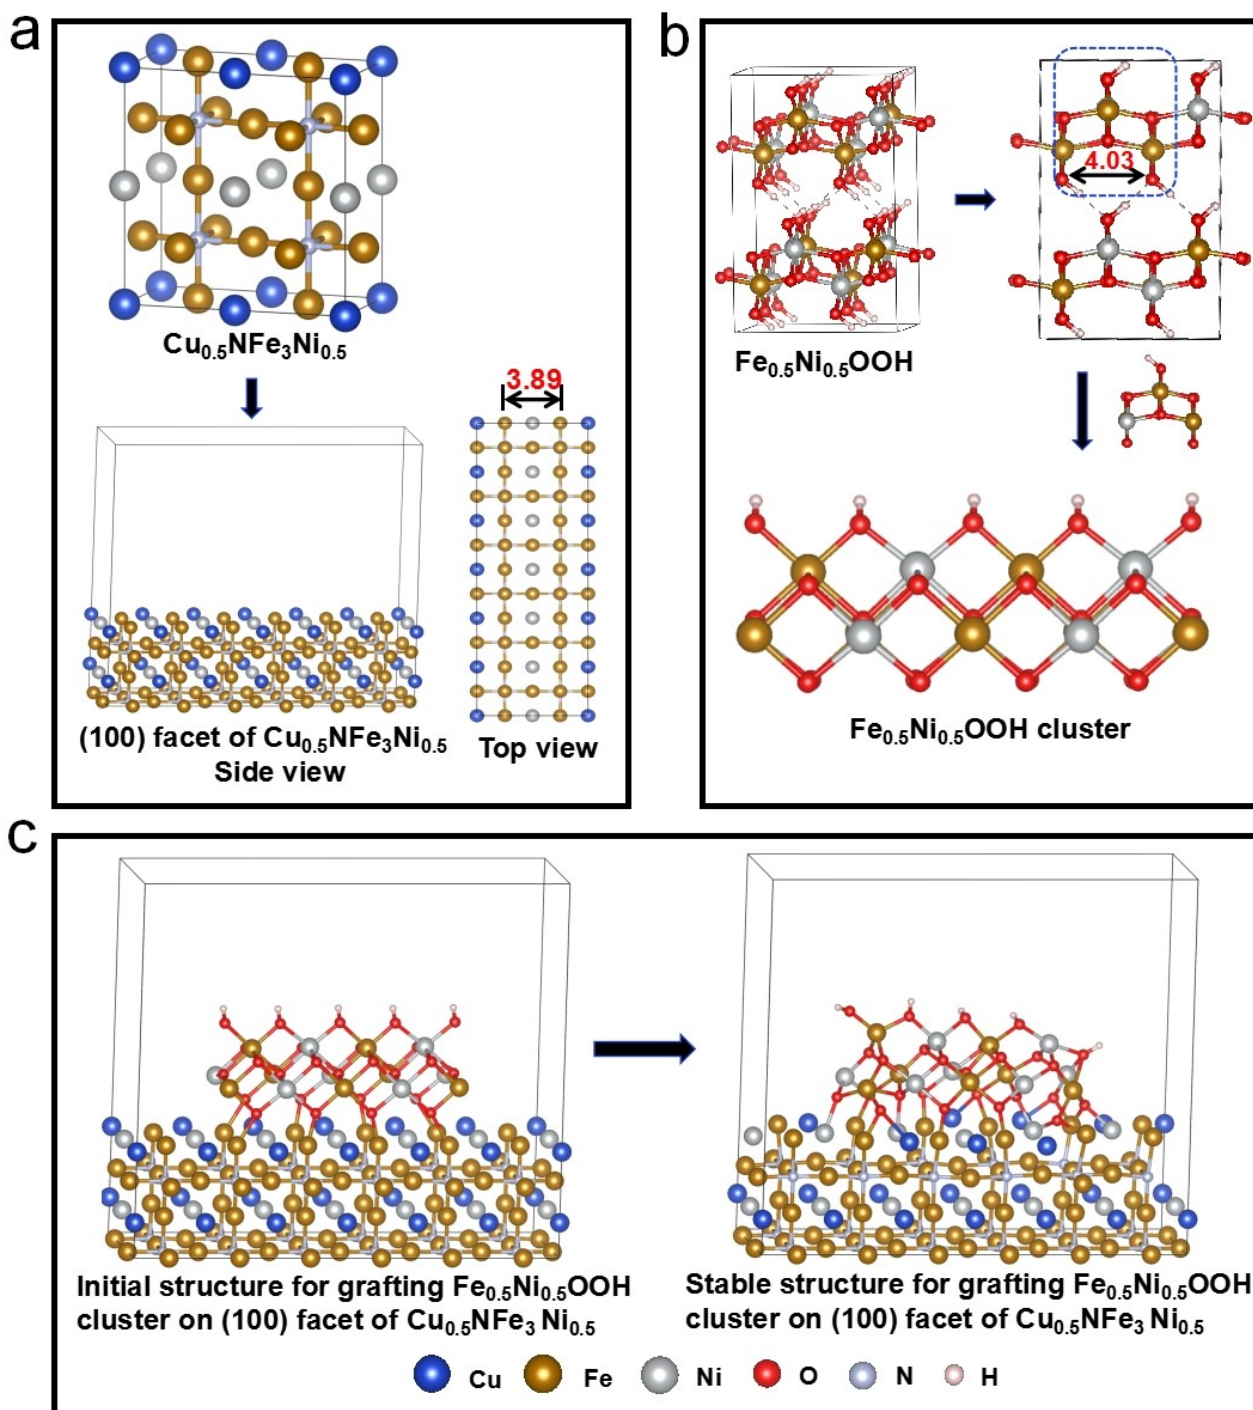

**Fig. S8** The structure of grafting  $\text{Fe}_{0.5}\text{Ni}_{0.5}\text{OOH}$  cluster on (100) facet of  $\text{Cu}_{0.5}\text{NFe}_3\text{Ni}_{0.5}$ . (a) The structure of  $\text{Cu}_{0.5}\text{NFe}_3\text{Ni}_{0.5}$  and (100) facet of  $\text{Cu}_{0.5}\text{NFe}_3\text{Ni}_{0.5}$ . (b) The structures of  $\text{Fe}_{0.5}\text{Ni}_{0.5}\text{OOH}$  and its cluster. The  $\text{Fe}_{0.5}\text{Ni}_{0.5}\text{OOH}$  cluster is constructed by matching the distance between adjacent O atoms of  $\text{Fe}_{0.5}\text{Ni}_{0.5}\text{OOH}$  and the distance of two Fe atoms on (100) facet of  $\text{Cu}_{0.5}\text{NFe}_3\text{Ni}_{0.5}$ . (c) Grafting the  $\text{Fe}_{0.5}\text{Ni}_{0.5}\text{OOH}$  cluster onto (100) facet of  $\text{Cu}_{0.5}\text{NFe}_3\text{Ni}_{0.5}$ .

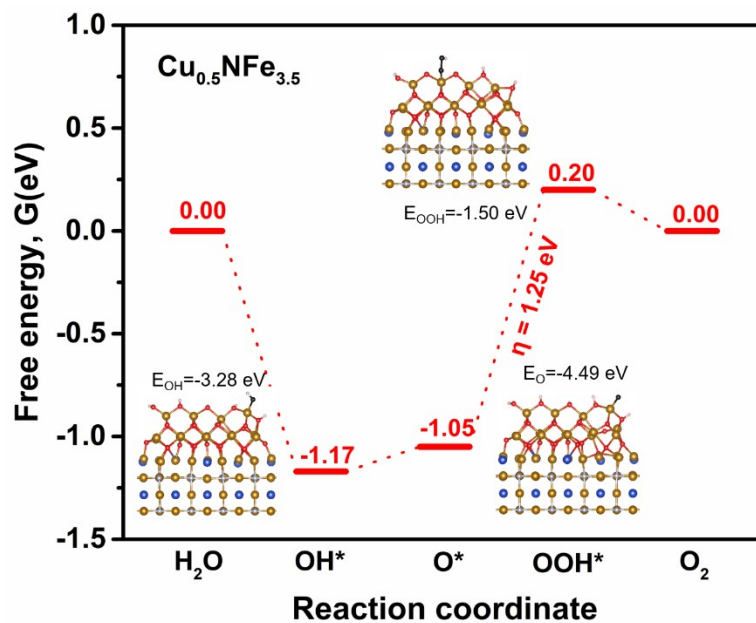

**Fig. S9** The free energy diagrams for OER intermediates adsorbing onto paramagnetic FeOOH/paramagnetic  $\text{Cu}_{0.5}\text{NFe}_{3.5}$  at 1.23 V, with calculated structures, adsorbed energy ( $E$ ) and rate-determining step.

**Table S1.** Compositions of the samples determined by ICP-OES.

| <b>Samples</b>                               | <b>The content of metal ions (<math>\mu\text{mol}</math>)</b> |           |           | <b>Mole ratio</b> |              |
|----------------------------------------------|---------------------------------------------------------------|-----------|-----------|-------------------|--------------|
|                                              | <b>Cu</b>                                                     | <b>Fe</b> | <b>Ni</b> | <b>Fe/Cu</b>      | <b>Fe/Ni</b> |
| $\text{Cu}_{0.5}\text{NFe}_{3.5}$            | 40.76                                                         | 285.19    | /         | 7.02              | /            |
| $\text{Cu}_{0.5}\text{NFe}_3\text{Ni}_{0.5}$ | 37.40                                                         | 213.30    | 35.56     | 5.7               | 5.99         |

**Table S2.** The comparison of the OER performance of  $\text{Cu}_{0.5}\text{NFe}_3\text{Ni}_{0.5}$  with the electrocatalysts currently reported.

| Catalyst                                           | Overpotential $\eta$<br>(mV) |                            |                            | Tafel<br>slope<br>( $\text{mV dec}^{-1}$ ) | Substrate                        | Reference |
|----------------------------------------------------|------------------------------|----------------------------|----------------------------|--------------------------------------------|----------------------------------|-----------|
|                                                    | 10<br>$\text{mA cm}^{-2}$    | 100<br>$\text{mA cm}^{-2}$ | 200<br>$\text{mA cm}^{-2}$ |                                            |                                  |           |
| $\text{Cu}_{0.5}\text{NFe}_3\text{Ni}_{0.5}$       | 244                          | 310                        | 340                        | 59                                         | carbon paper<br>(CP)             | This work |
| p- $\text{Cu}_{1-x}\text{NNi}_{3-y}/\text{FeNiCu}$ | 280                          | 403                        | -                          | 52                                         | glass carbon<br>(GC)             | [1]       |
| $\text{CuNCo}_{2.4}\text{V}_{0.6}$                 | 235                          | 306                        | 320                        | 52                                         | CP                               | [2]       |
| $\text{Co}_4\text{N}/\text{CNW}$                   | 310                          | 510                        | -                          | 81                                         | carbon cloth<br>(CC)             | [3]       |
| $\text{Fe}_3\text{O}_4/\text{Ni}_3\text{FeN}$      | 290                          | 353                        | -                          | 43                                         | rotation disk electrode<br>(RDE) | [4]       |
| $\text{InNCo}_{2.7}\text{Mn}_{0.3}$                | 300                          | 380                        | 395                        | 84                                         | GC                               | [5]       |

**Table S3.** Fitting parameters of EIS plot shown in Fig.3c by using the Randle's equivalent circuit.

| Samples                                              | CPE  |                                      | C <sub>ct</sub> (mF) | R <sub>ct</sub> (ohm) | R <sub>s</sub> (ohm) |
|------------------------------------------------------|------|--------------------------------------|----------------------|-----------------------|----------------------|
|                                                      | n    | Q (μΩ <sup>-1</sup> s <sup>n</sup> ) |                      |                       |                      |
| Cu <sub>0.5</sub> NFe <sub>3</sub> Ni <sub>0.5</sub> | 0.99 | 1672.8                               | 1.59                 | 3.56                  | 6.982                |
| Cu <sub>0.5</sub> NFe <sub>3.5</sub>                 | 0.94 | 1818.9                               | 1.49                 | 26.7                  | 7.129                |
| IrO <sub>2</sub>                                     | 0.72 | 1204.7                               | 0.28                 | 19.57                 | 5.227                |

From CPE parameters (Q and n values, Q is the pre-factor of the CPE and n is exponent of the CPE), the capacitance was calculated using equation of  $C_{ct} = Q^{1/n} (1/R_s + 1/R_{ct})^{(n-1)/n}$  (Ref. B. Hirschorn, M. E. Orazem, B. Tribollet, V. Vivier, I. Frateur, M. Musiani, *Electrochim. Acta* 2010, **55**, 6218).

**Table S4.** The free energy for  $\text{Cu}_{0.5}\text{NFe}_3\text{Ni}_{0.5}$  or  $\text{Cu}_{0.5}\text{NFe}_{3.5}$  respectively grafting by  $\text{Fe}_{0.5}\text{Ni}_{0.5}\text{OOH}$  or  $\text{FeOOH}$  cluster with different magnetic ground states.

| Samples                                                                                    | $\Delta E$ (eV) |               |              |
|--------------------------------------------------------------------------------------------|-----------------|---------------|--------------|
|                                                                                            | Ferromagnetic   | Ferrimagnetic | Paramagnetic |
| $\text{Cu}_{0.5}\text{NFe}_{3.0}\text{Ni}_{0.5}@ \text{Fe}_{0.5}\text{Ni}_{0.5}\text{OOH}$ | -936.63727      | -937.61613    | -938.80571   |
| $\text{Cu}_{0.5}\text{NFe}_{3.5}@ \text{FeOOH}$                                            | -1010.0083      | -1008.695     | -1009.155    |

## Supplementary References

- 1 Y. Zhu, G. Chen, Y. Zhong, Y. Chen, N. Ma, W. Zhou and Z. Shao, *Nat. Commun.*, 2018, **9**, 2326.
- 2 J. Zhang, X. Zhao, L. Du, Y. Li, L. Zhang, S. Liao, J. B. Goodenough and M. Cui, *Nano Lett.*, 2019, **19**, 7457-7463.
- 3 Meng, F., Zhong, H., Bao, D., Yan, J. and Zhang, X. *J. Am. Chem. Soc.*, 2016, **138**, 10226-10231.
- 4 N. Ma, G. Chen, Y. Zhu, H. Sun, J. Dai, H. Chu, R. Ran, W. Zhou, R. Cai and Z. Shao, *Small*, 2020, **16**, 2002089.
- 5 L. Du, M. Lv, J. Zhang, H. Song, D. Dang, Q. Liu, Z. Cui and S. Liao, *ACS Appl. Energy Mater.*, 2020, **3**, 5293-5300.
